# Supplementary material for: Sex-stratified analysis of complete blood count parameters in Helicobacter pylori infection: A retrospective cohort study revealing distinct hematological mechanisms
Source: Research Square preprint supplement (doi:10.21203/rs.3.rs-7142446/v1), 2025-10-15
Supplement: Supplementary file 1 [file 4c279aec7acb5e6faa21f253.docx]

**FIGURE S1**


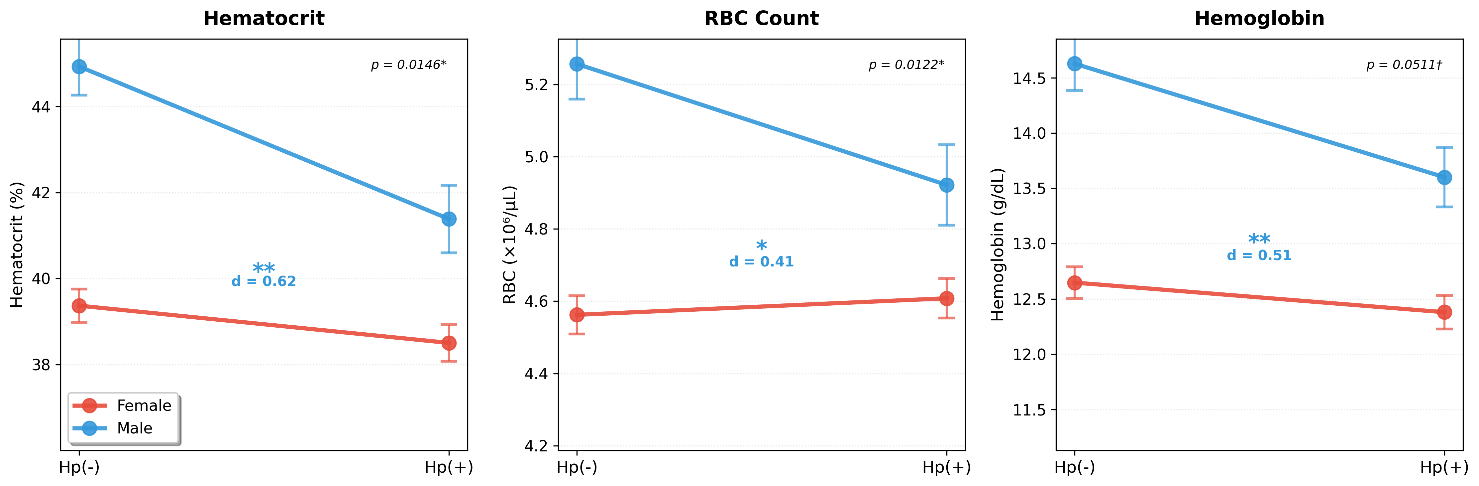


**FIGURE S1.** Sex × *H. pylori* interaction effects on hematological parameters. Non-parallel lines indicate significant sex × *H. pylori* interactions for hematocrit (***p*** = 0.0146) and RBC count (***p*** = 0.0122), with a near-significant interaction for hemoglobin (***p*** = 0.0511). Error bars represent SEM. ****p*** < 0.05, *****p*** < 0.01, ******p*** < 0.001 for within-sex comparisons; †***p*** < 0.10. **d** = Cohen's effect size.

**FIGURE S2**


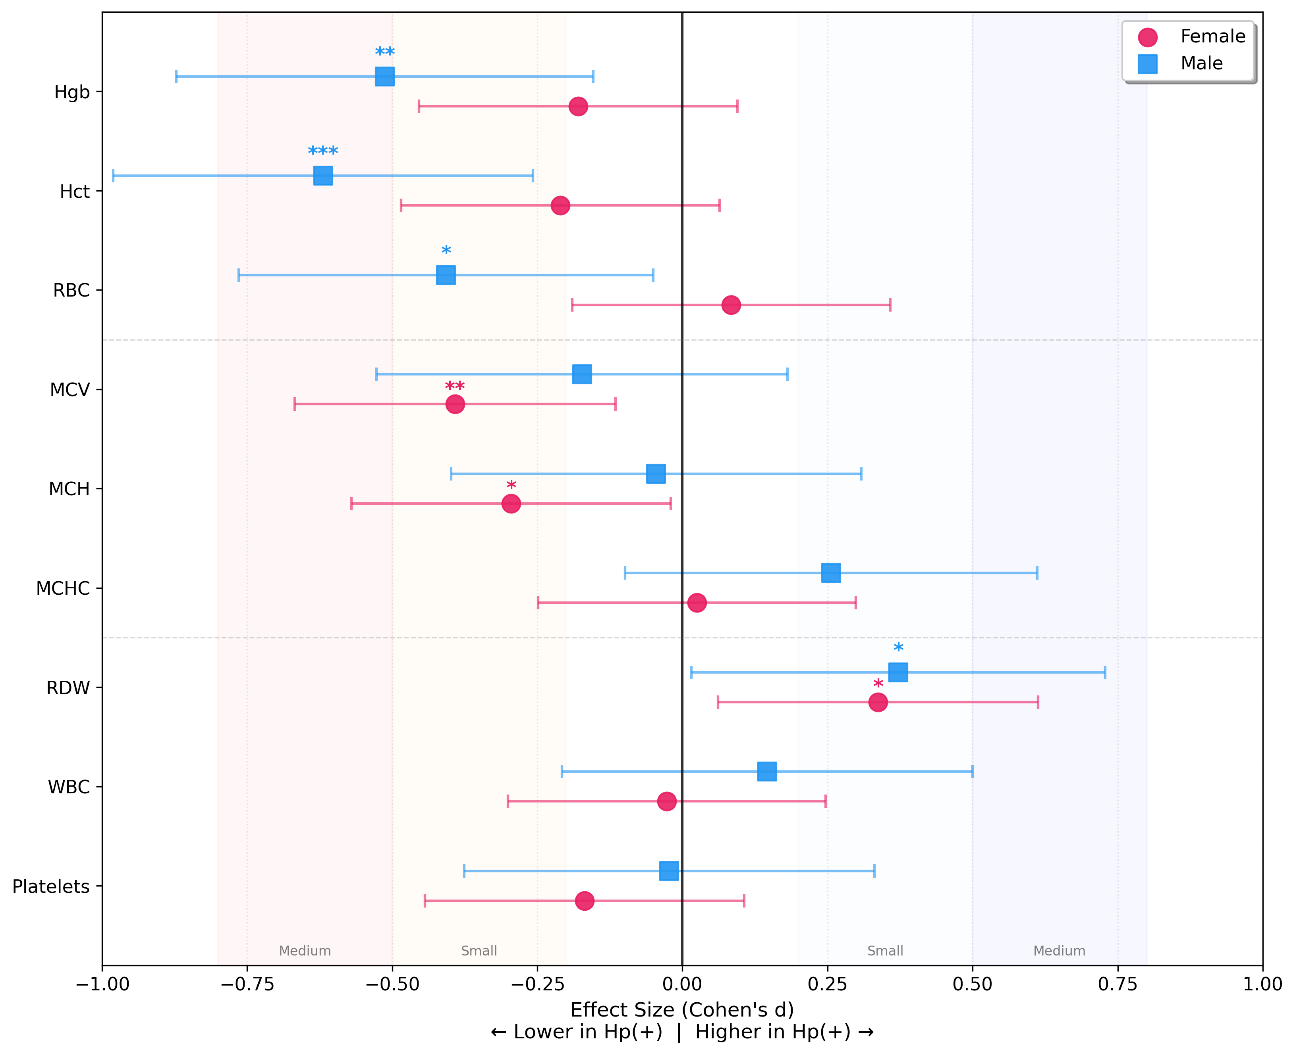


**FIGURE S2.** Forest plot of sex-stratified effect sizes (Cohen's d) for complete blood count parameters in *H. pylori* infection. Points represent effect sizes with 95% confidence intervals (horizontal lines). Negative values indicate lower values in *H. pylori*-positive compared to *H. pylori*-negative participants; positive values indicate higher values in *H. pylori*-positive participants. Circles represent females (pink), squares represent males (blue). **p* < 0.05, ***p* < 0.01, ****p* < 0.001. A vertical line at zero indicates no effect. Shaded regions indicate small (0.2-0.5) and medium (0.5-0.8) effect sizes.

**TABLE S1**

**TABLE S1**. WHO Anemia Prevalence and Types by Sex and H. pylori Status

|  | **Female** | | | **Male** | | |
| --- | --- | --- | --- | --- | --- | --- |
| **Parameter** | **Hp(-)** | **Hp(+)** | ***p*-value** | **Hp(-)** | **Hp(+)** | ***p*-value** |
| Anemia prevalence, n (%) | 25 (24.5) | 32 (31.1) | 0.372 | 7 (11.5) | 20 (32.3) | **0.010** |
| Microcytic | 7 (28.0) | 16 (50.0) |  | 2 (28.6) | 7 (35.0) |  |
| Normocytic | 17 (68.0) | 15 (46.9) |  | 3 (42.9) | 13 (65.0) |  |
| Macrocytic | 1 (4.0) | 1 (3.1) |  | 2 (28.6) | - |  |

*WHO anemia criteria: Males Hgb <13.0 g/dL, Females Hgb <12.0 g/dL. Anemia types: Microcytic <80 fL, Normocytic 80-95 fL, Macrocytic >95 fL.*

*Data presented as n (%). Anemia prevalence calculated as % of total participants; anemia types calculated as % of anemic participants only. Bold p-values indicate p<0.05.*
